# Supplementary material for: Pituitary Adenylate Cyclase-Activating Polypeptide—A Neuropeptide as Novel Treatment Option for Subacute Ileitis in Mice Harboring a Human Gut Microbiota
Source: PubMed Central journal article supplement (PMC6438926; doi:10.3389/fimmu.2019.00554), 2019-03-22
Supplement: Image_2.pdf [file Image_2.pdf]

| Target group                                                                                                                     | Amplicon size | Annealing | Sequence 5'-3'                                        | Reference                                      |
|----------------------------------------------------------------------------------------------------------------------------------|---------------|-----------|-------------------------------------------------------|------------------------------------------------|
| <b>Domain Bacteria (targets V3 region)</b>                                                                                       | 200           | 60°C      | F: CGGYCCAGACTCCTACGGG<br>R: TTACCGCGGCTGCTGGCAC      | Lee et al. (1996)                              |
| <b><i>Clostridium</i> 16S rRNA cluster IV*</b><br>[ <i>Clostridium leptum</i> subgroup)                                          | 239           | 50°C      | F: GCACAAGCAGTGGAGT<br>R: CTTCTCCGTTTTGTCAA           | Matsuki et al. (2004)<br>Shen et al. (2006)    |
| <b><i>Bifidobacterium</i> genus</b>                                                                                              | 243           | 58°C      | F: TCGCGTC(C/T)GGTGTGAAAG<br>R: CCACATCCAGC(A/G)TCCAC | Rinttila et al. (2004)                         |
| <b><i>Lactobacillus</i> group including</b><br><i>Leuconostoc</i> , <i>Pediococcus</i> ,<br><i>Aerococcus</i> , <i>Weissella</i> | 341           | 58°C      | F: CACCGCTACACATGGAG<br>R: AGCAGTAGGGAATCTTCCA        | Heilig et al. (2002)<br>Walter et al. (2001)   |
| <b><i>Mouse Intestinal Bacteroides</i></b>                                                                                       | 161           | 58°C      | F: CCAGCAGCCGCGTAATA<br>R: CGCATTCCGCATACTTCTC        | Barman et al. (2008)                           |
| <b><i>Bacteroides</i> group, including</b><br><i>Prevotella</i> , <i>Porphyromonas</i>                                           | 418           | 59°C      | F: GAAGGTCCCCCACATTG<br>R: CAATCGGAGTTCTTCGTG         | Bartosch et al. (2004)                         |
| <b><i>Enterococcus</i> genus</b>                                                                                                 | 337           | 55        | ATCAGAGGGGGATAACA<br>ACTCTCATCCTTGTTCTTCTC            | Matsuda et al. (2009)                          |
| <b><i>Clostridium coccoides/</i></b><br><b><i>Eubacterium rectale</i> Group</b>                                                  | 429           | 55°C      | F: CGGTACCTGACTAAGAAGC<br>R: AGTTT(C/T)ATTCTTGCGAACG  | Rinttila et al. (2004)                         |
| <b>gamma-Proteobacteria/Enterobacteriaceae</b>                                                                                   | 517           | 60°C      | F: AAAC TCAAATGAATTGACGG<br>R: CTTTTGCAACCCACTCC      | Kühbacher et al. (2006)<br>Sghir et al. (2000) |
