# Supplementary material for: Pituitary Adenylate Cyclase-Activating Polypeptide—A Neuropeptide as Novel Treatment Option for Subacute Ileitis in Mice Harboring a Human Gut Microbiota
Source: PubMed Central journal article supplement (PMC6438926; doi:10.3389/fimmu.2019.00554), 2019-03-22
Supplement: Image_3.pdf [file Image_3.pdf]

# A Apoptotic Cells (ILEUM)

Naive

*T. gondii* +PLC

*T. gondii* +PACAP

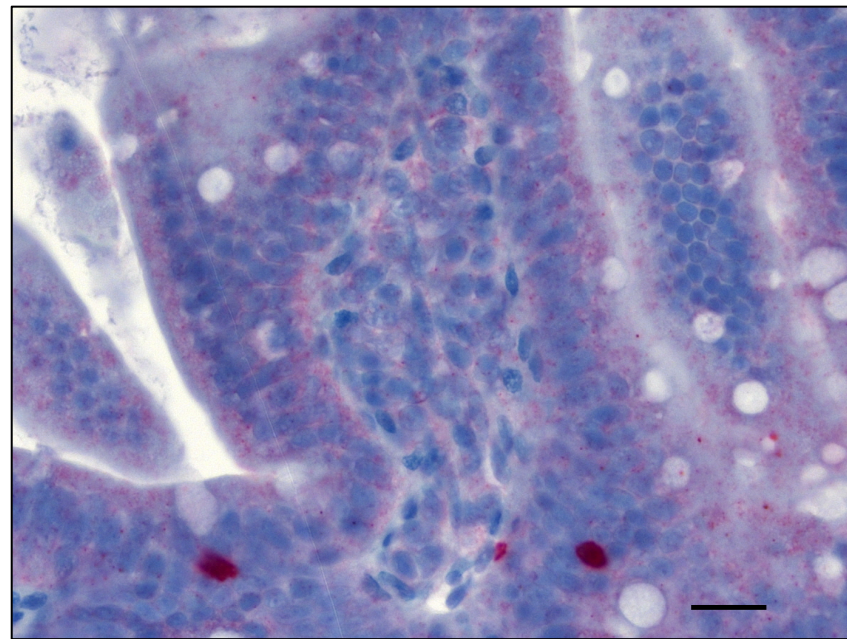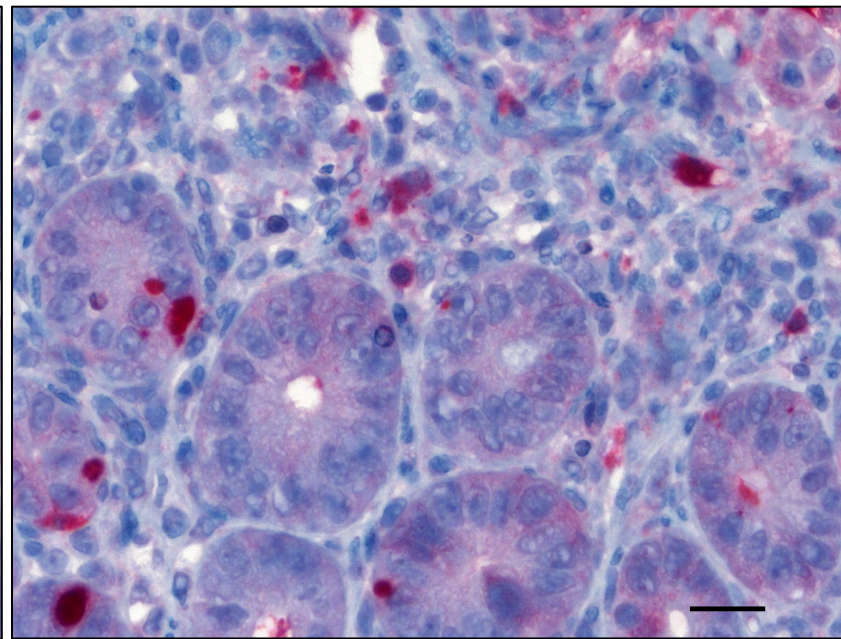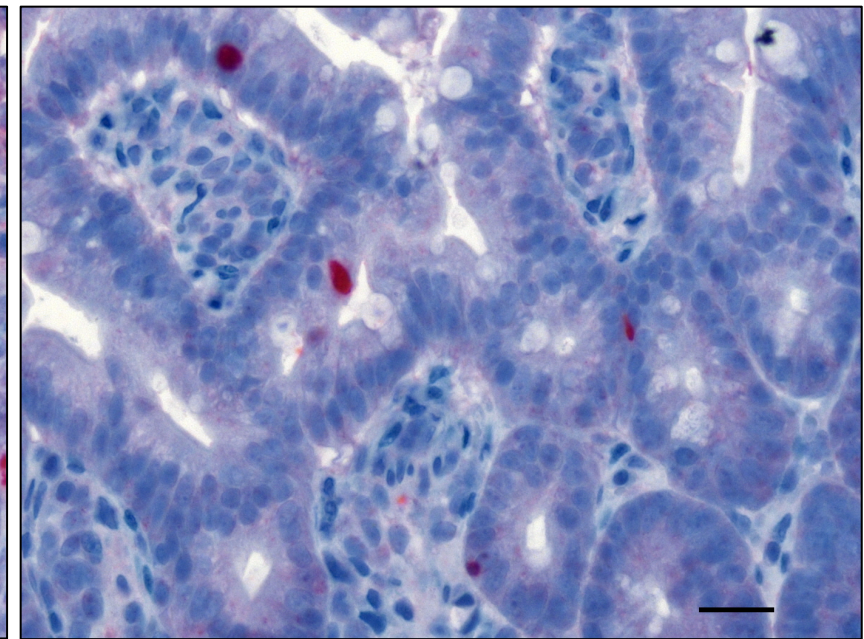

(400 x magnification, scale bar 20  $\mu$ m)



# B T Lymphocytes (ILEUM)

Naive

*T. gondii* +PLC

*T. gondii* +PACAP

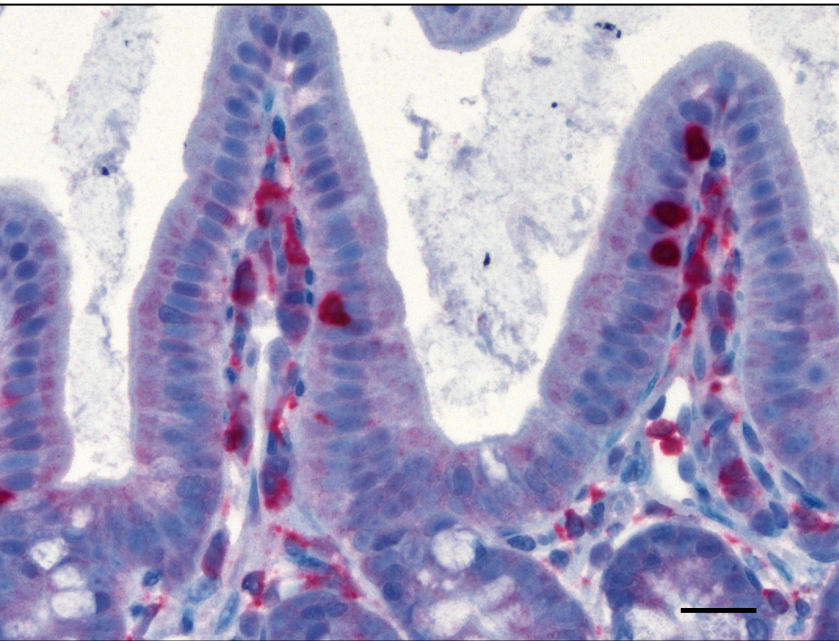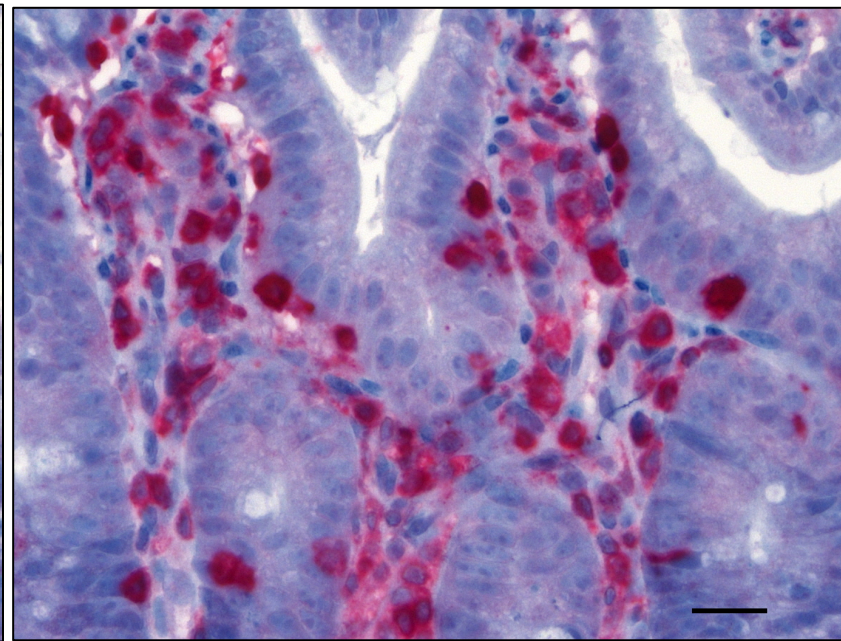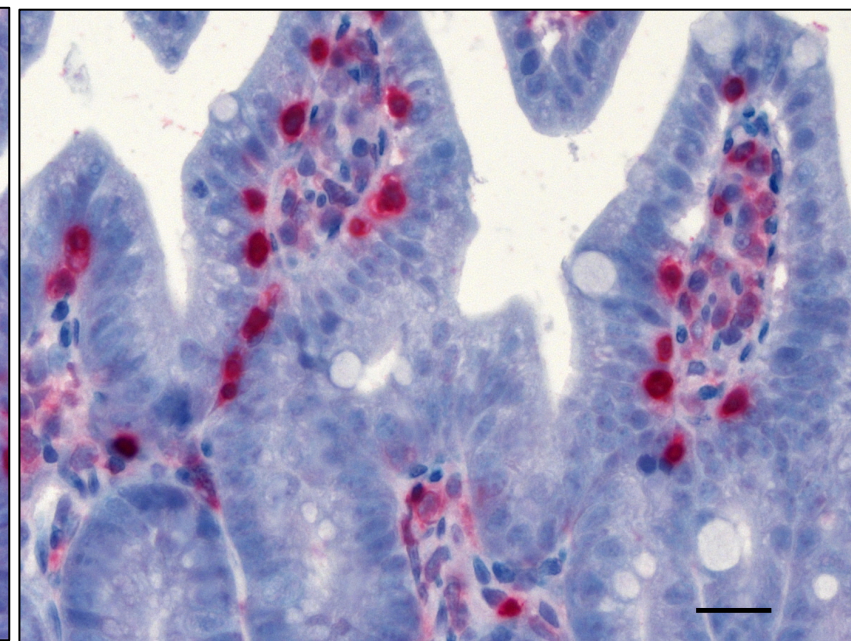

(400 x magnification, scale bar 20  $\mu$ m)



# C Apoptotic Cells (COLON)

Naive

*T. gondii* +PLC

*T. gondii* +PACAP

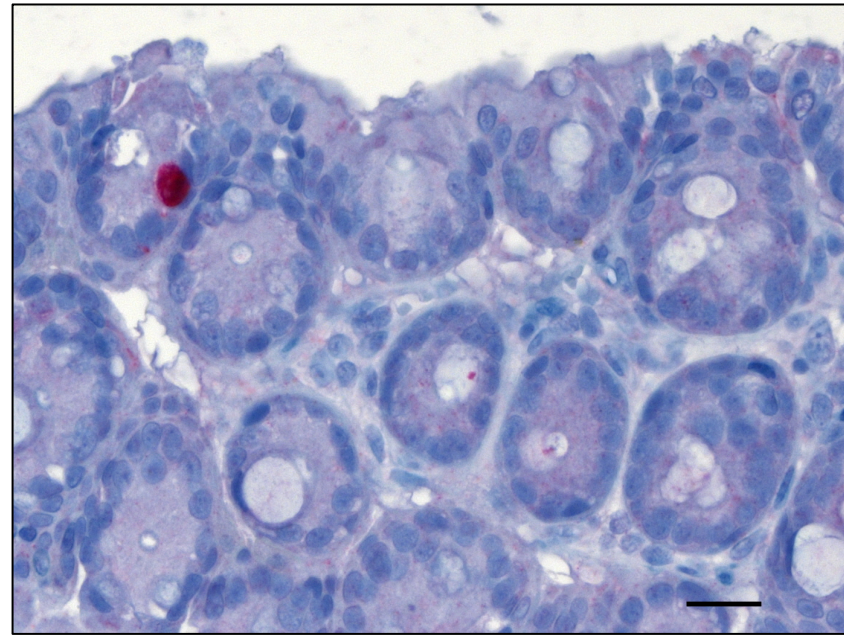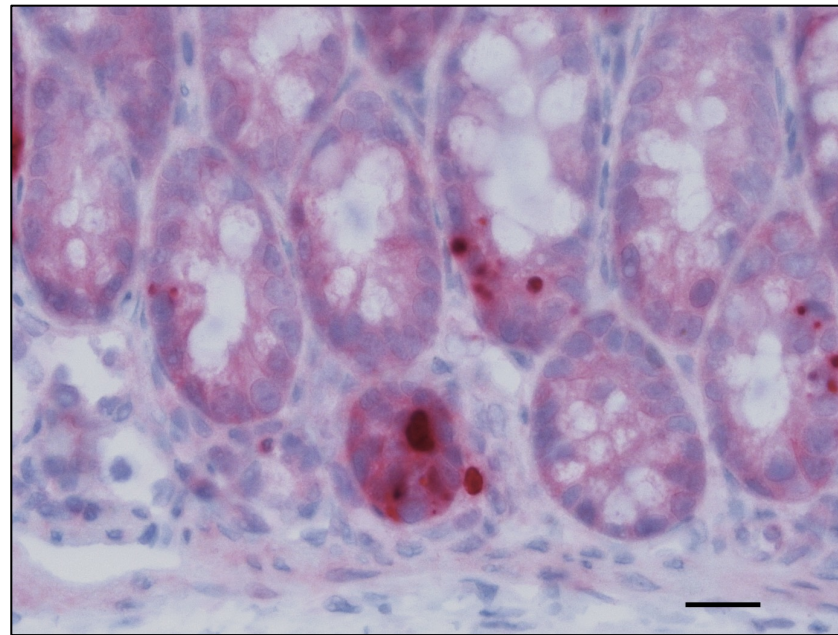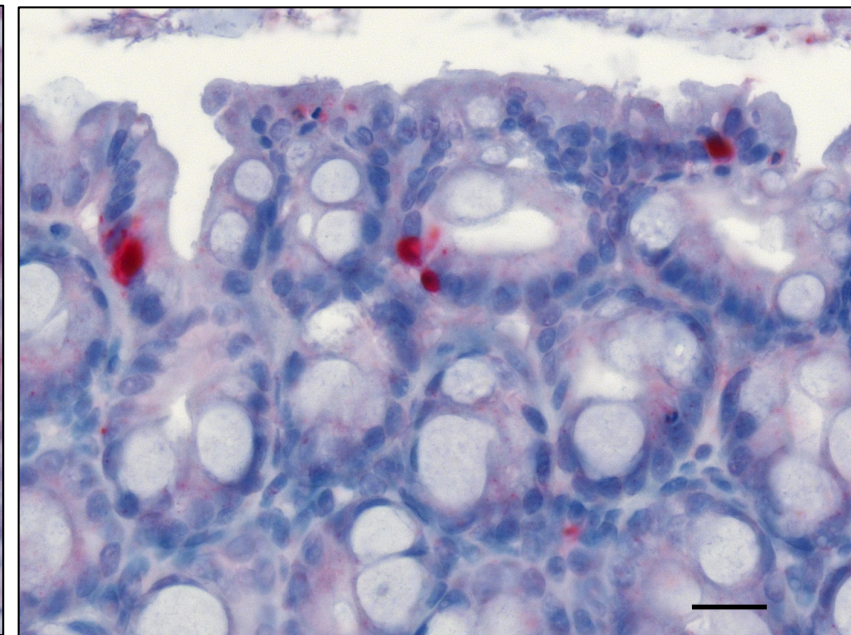

(400 x magnification, scale bar 20  $\mu$ m)



# D T Lymphocytes (COLON)

Naive

*T. gondii* +PLC

*T. gondii* +PACAP

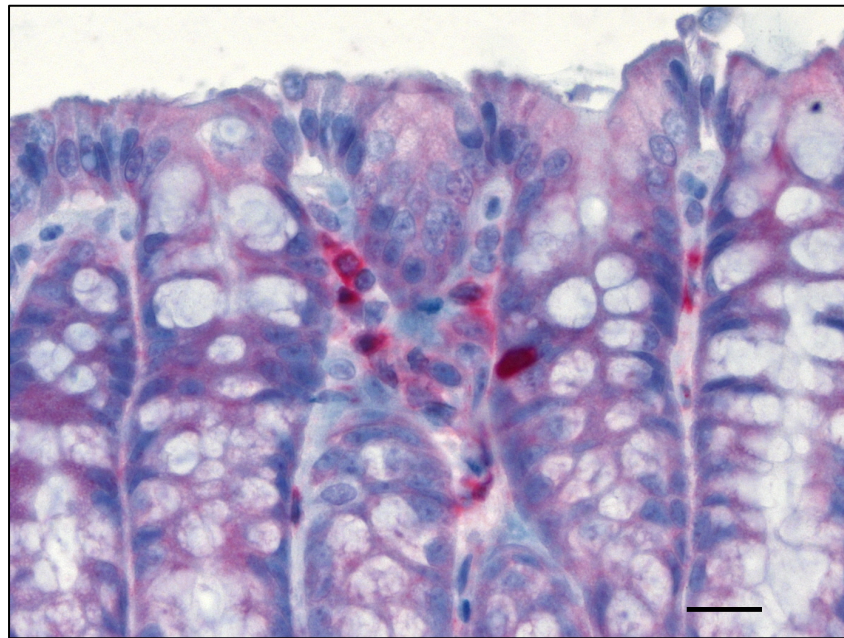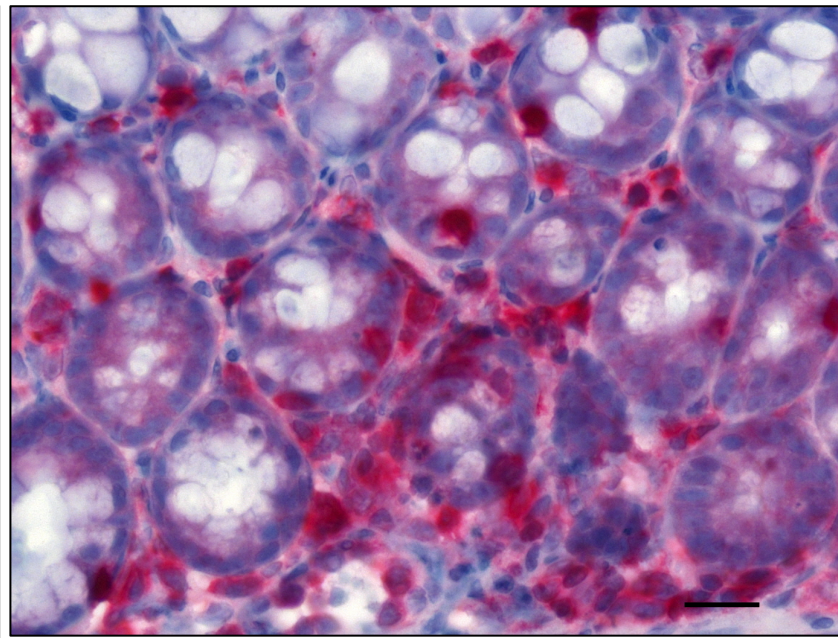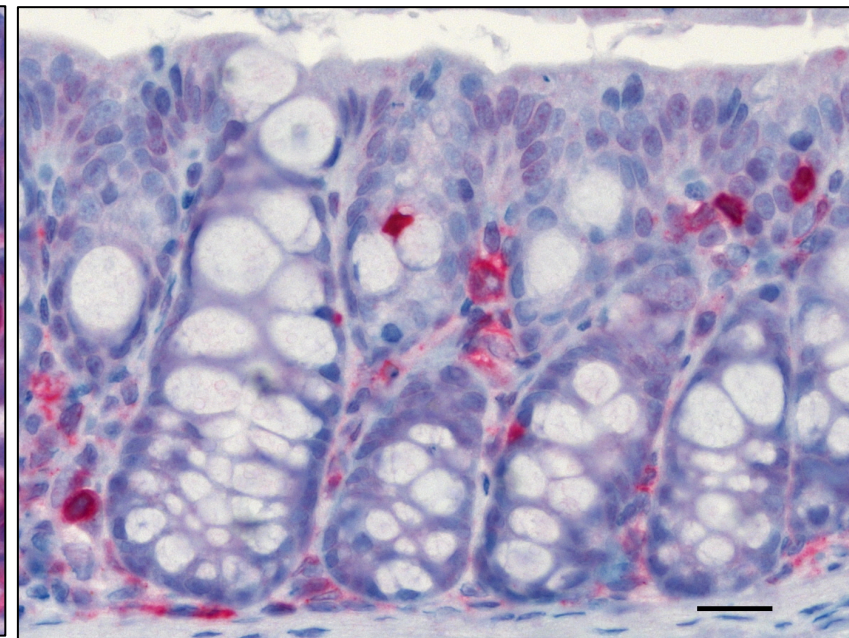

(400 x magnification, scale bar 20  $\mu$ m)
